# Supplementary material
Source: PubMed Central journal article supplement (PMC2563094)
Supplement: 0802343105_0802343105SI.pdf [file 0802343105_0802343105SI.pdf]

# Supporting Information

Duponchelle *et al.* 10.1073/pnas.0802343105

## SI Text

Accession numbers of the 581 sequences of control region (D-Loop) (\*, sequences kept for the analyses):

F213520\*-AF213522\*, AF213526\*, AF213541\*, AF213542\*, AF213554\*, AF213619\*-AF213621\*, AF213623\*, AF213624\*, AF213626\*, AF298907\*-AF298928\*, AF298930\*-AF298937\*, AF298942\*-AF298957\*, AF298959\*-AF298961\*, AF298964\*-AF298967\*, AF298969\*-AF298975\*, AF298977\*-AF298979\*, AF298982\*, AF298984\*, AF298985\*, AF400702\*, AF400706\*, AF400707\*, AF400710\*, AF400726\*, AF400727\*, AF400729\*-AF400732\*, AF400734\*, AF400735\*, AF400737\*, AJ291404\*, AJ291409\*, AJ291410\*, AJ291412\*, AJ295929\*, AJ407078-AJ407143, AJ489716, AJ492025-AJ492142, AJ492143\*-AJ492145\*, AJ506160\*, AY226786\*, AY301960\*-AY301963\*, AY301964-AY301966, AY301973, AY301974, AY338979\*-AY338981\*, AY338982-AY338986, AY339003-AY339009, AY339027\*-AY339029\*, AY339033\*-AY339035\*, AY339037\*-AY339039\*, AY339042\*-AY339045\*, AY339050\*-AY339053\*, AY574581\*-AY574583\*, AY574585, AY574587\*, AY574589, AY574591, AY574604-AY574608, AY574610\*, AY574611, AY574612, AY574614, AY574615, AY574618, AY574619, AY574628, AY574633, AY615431-AY615445, AY615462-AY615475, AY615476\*-AY615478\*, AY615479-AY615496, AY615497\*-AY615499\*, AY629408\*, AY629411\*, AY663759\*, AY663761\*-AY663767\*, AY663781\*-AY663783\*, AY682486\*, AY682487\*, AY682501\*-AY682506\*, AY682508\*, AY740289\*, AY740320\*, AY740328\*-AY740331\*, AY913939\*, AY913940\*, AY929939\*, AY929940\*, AY929956\*, AY929961, AY929962, AY929964\*, AY929972, AY929974, AY929975\*, AY929978, AY929980, AY930020, AY930021, AY930023, AY930024\*, AY930025\*, AY930039\*, AY930040\*, DQ054907\*, U01107\*, U01109\*, U01111, U01113\*-U01116\*, U01927\*-U01931\*, U01933\*-U01935\*, U01938\*-U01944\*, U01951\*-U01954\*, U12547\*-U12549, U12551\*, U13597\*, U13600\*-U13607\*, U38808, U38984, U38985\*, U38986-U38995, U50347\*-U50349\*, U90760\*-U90766\*, U90768\*-U90781\*, X58151\*, X58152\*, X90593\*-X90595\*, X90596-X90603, X90604\*-X90609\*, X90610, X90626\*, Z21750\*, Z97410-Z97418, Z97420-Z97438, Z97461-Z97463, Z97465

Accession numbers of the 134 sequences of the NADH-2:

AF305246, AF305249, AF305250, AF305252, AF305255-AF305261, AF305266-AF305268, AF305276, AF305281-AF305283, AF305287-AF305291, AF305297, AF305298, AF305304, AF305310-AF305314, AF305316, AF305318, AF305321, AF305323, AF317240, AF317265, AF317266, AF317268, AF317272, AF398214-AF398216, AF398218, AF398220-AF398225, AF398227, AF398229, AF398230, AF398232, AY337767, AY337769, AY337770, AY337774, AY337778, AY337779, AY337781-AY337783, AY337785-AY337787, AY337790, AY337795, AY663716, AY663717-AY663722, AY663736, AY663737, AY682518-AY682524, AY682538-AY682542, AY682544, AY682546, AY740343, AY740370, AY740379-AY740381, AY930048, AY930061, AY930066-AY930071, AY930085, AY930087, AY930088, AY930091, AY930093, AY930100, AY930107, DQ055006, DQ055010, DQ055018, DQ055041, DQ093109, DQ093110, DQ093113-DQ093115, U07239-U07242, U07247, U07248, U07254, U07257, U07260-U07263, U07267, U07270.

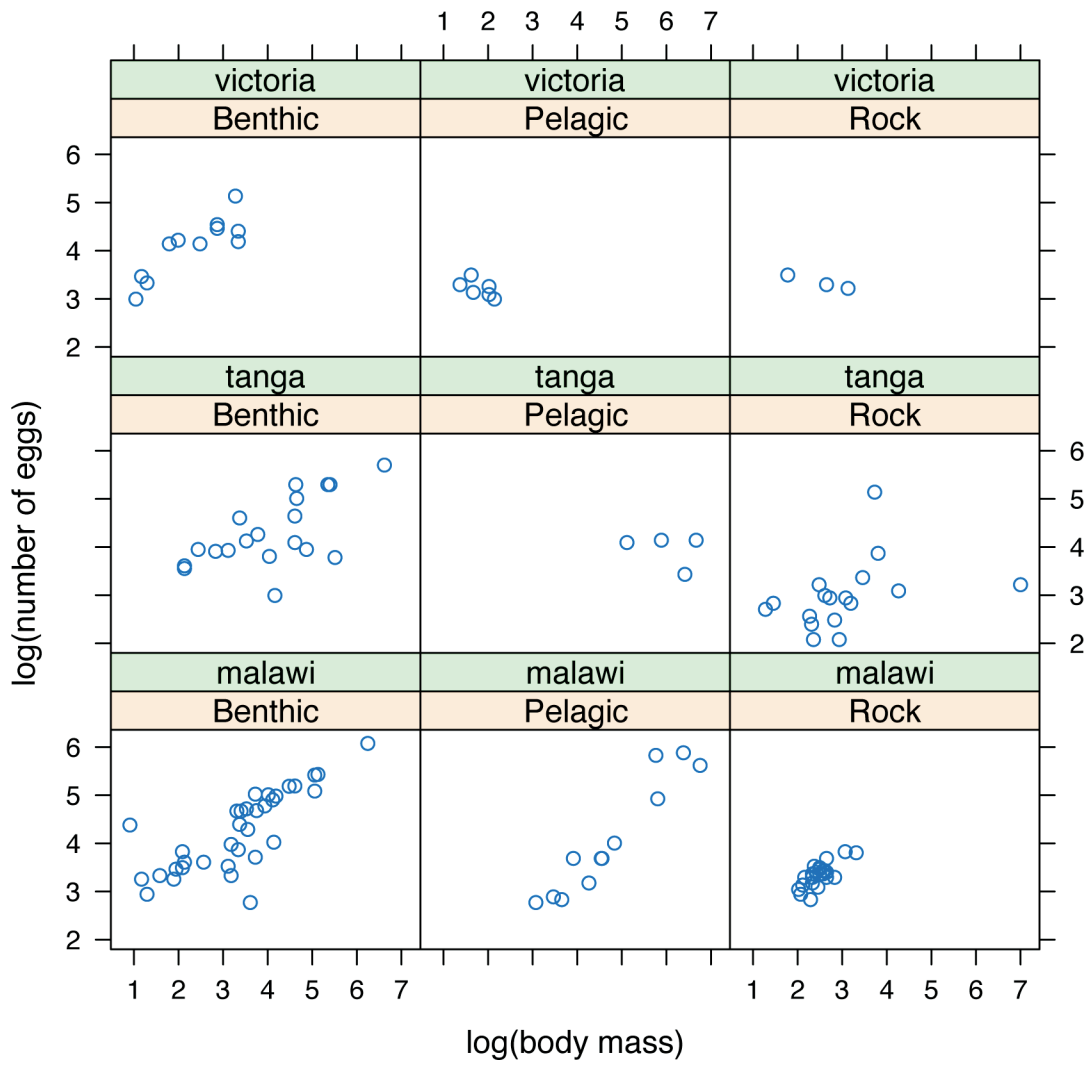

Fig. S1. Log-transformed relationships between batch fecundity (number of eggs) and body mass for all combinations of habitat and lake.

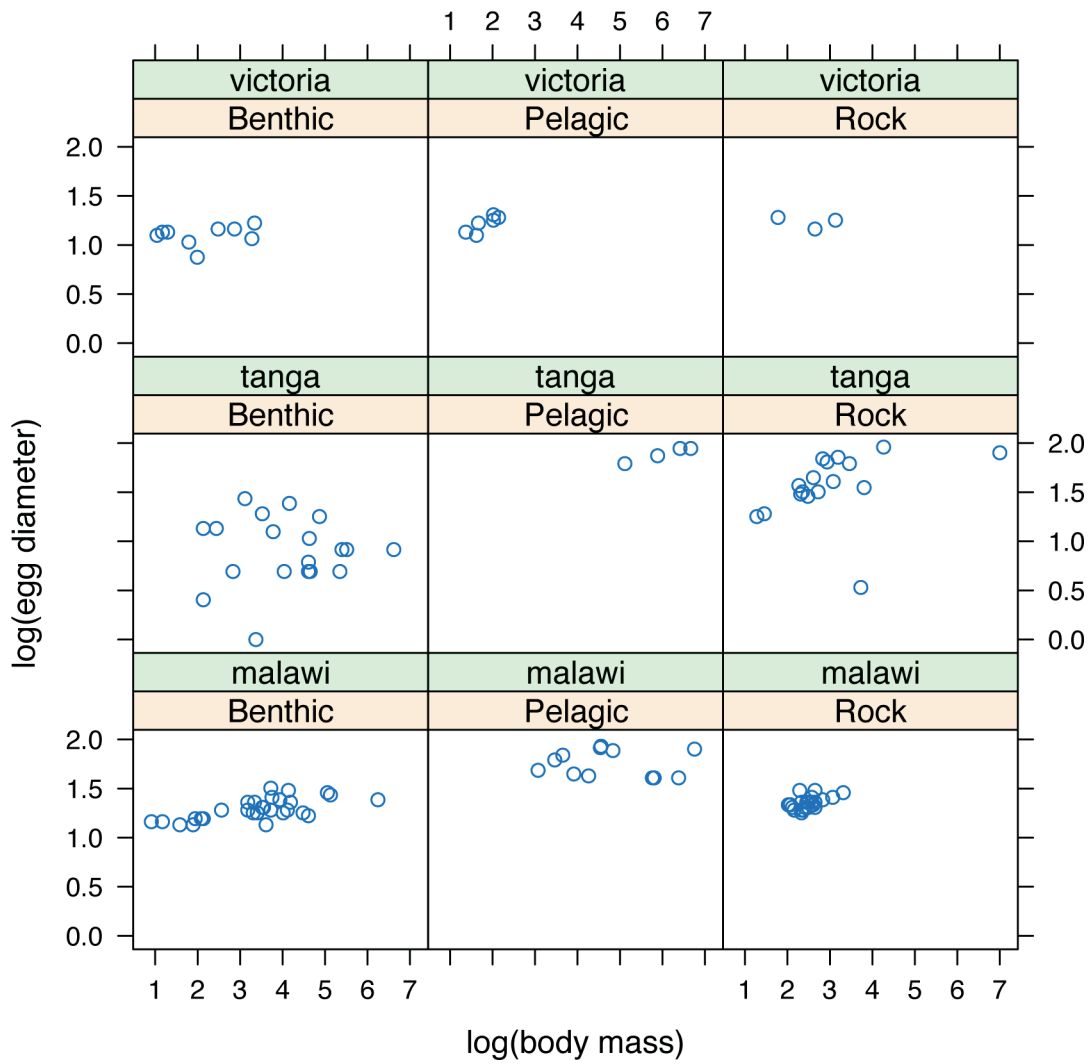

Fig. S2. Log-transformed relationships between egg diameter and body mass for all combinations of habitat and lake.



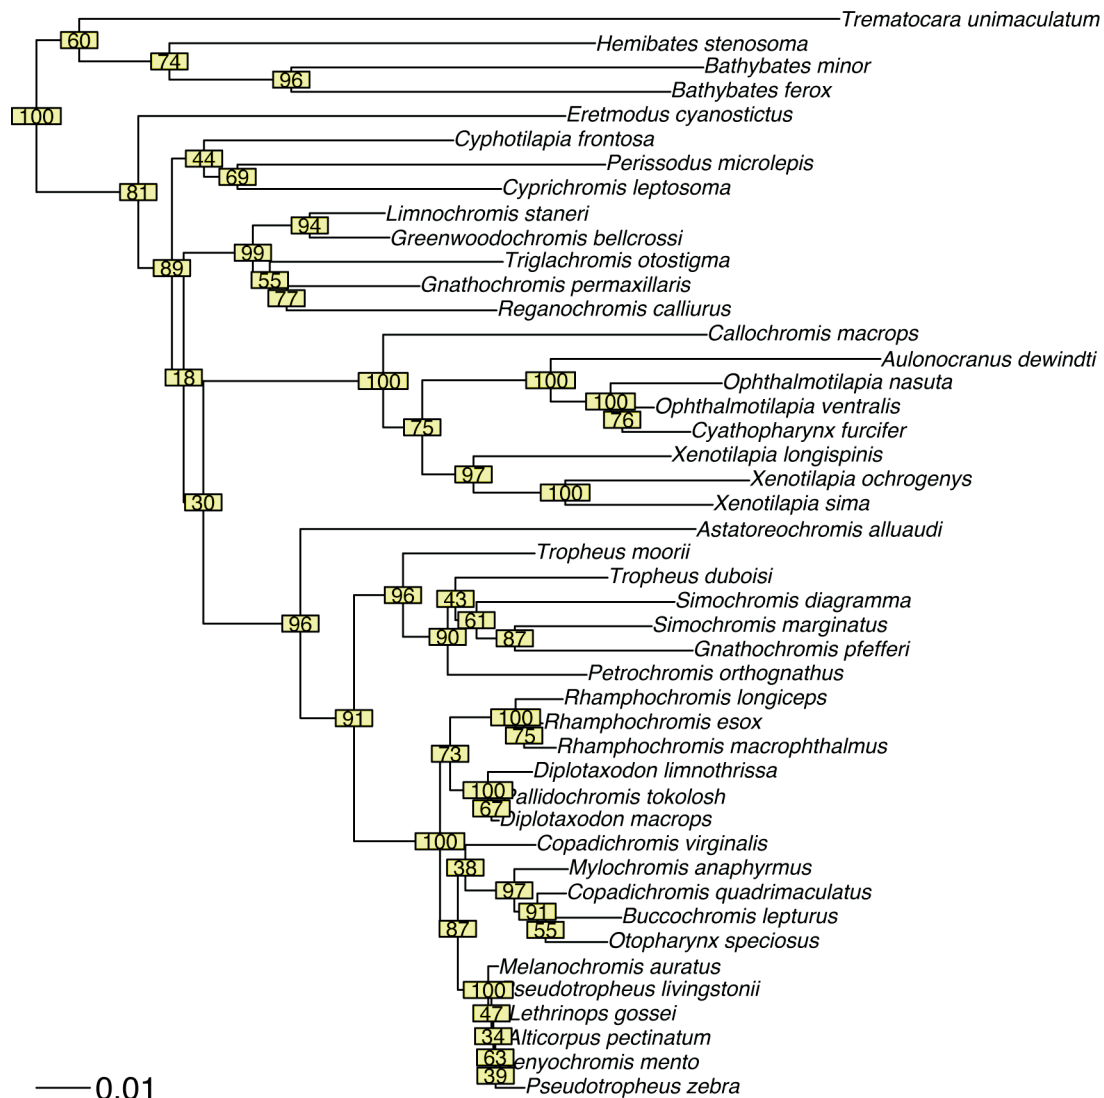

Fig. S4. Phylogenetic relationships among 45 species of African cichlids estimated by NJ from NADH-2 sequences. Values at node are bootstrap percentages (100 repetitions).

4. Thompson AB, Allison EH, Ngatunga BP (1996) Distribution and breeding biology of offshore cichlids in Lake Malawi/Niassa. *Environ Biol Fish* 47:235–254.
6. Duponchelle F, Ribbink AJ (2000) *Fish Ecology Report. SADC/GEF Lake Malawi/Nyasa Biodiversity Conservation Project, Final Report* (Southern African Development Conference/Global Environment Facility, Salima, Malawi) available online at <http://malawicichlids.com/mw14001.htm#DR00>.
10. Thompson AB, Allison EH, Ngatunga BP, Bulirani A (1995) Fish growth and breeding biology. *The Fishery Potential and Productivity of the Pelagic Zone of Lake Malawi Niassa*, ed Menz A (Natural Resources Institute, Chatham, UK), pp 279–306.
11. Turner GF, Robinson RL, Ngatunga BP, Shaw PW, Carvalho GR (2001) Pelagic fishes of lake Malawi/Nyasa. *Cichlid Research State of the Art*, ed Coleman RM. *J Aquaculture Aquat Sci* Special issue 9:287–302.
12. Coulter GW (1991) The benthic fish community. *Lake Tanganyika and Its Life*, ed Coulter GW (British Museum of Natural History/Oxford Univ Press, London), pp 139–199.
13. Balon EK (1991) Probable evolution of the coelacanth's reproductive style: Lecithotrophy and orally feeding embryos in cichlid fishes and in *Latimeria chalumnae*. *Environ Biol Fish* 32:249–265.
14. Nagoshi M, Yanagisawa Y (1997) Parental care patterns and growth and survival of dependent offspring in cichlids. *Fish Communities in Lake Tanganyika*, eds Kawanabe H, Hori M, Nagoshi M (Kyoto Univ Press, Kyoto), pp 177–192.
15. Kuwamura T (1986) Parental care and mating systems of cichlid fishes in Lake Tanganyika: A preliminary field survey. *J Ethol* 4:129–146.
16. Yanagisawa Y, Sato T (1990) Active browsing by mouthbrooding females of *Tropheus duboisi* and *Tropheus moorii* (Cichlidae) to feed the young and/or themselves. *Environ Biol Fish* 27:43–50.
17. Kuwamura T, Nagoshi M, Sato T (1989) Female-to-male shift of mouthbrooding in a cichlid fish, *Tanganicodus irsacae*, with notes on breeding habits of two related species in Lake Tanganyika. *Environ Biol Fish* 24:187–198.
18. Konings A (1988) The open water column. *Tanganyika Cichlids*, ed Konings A (Cichlid, Zevenhuizen, The Netherlands).
19. Konings A (1998) The open water. *Tanganyika Cichlids in Their Natural Habitat*, ed Konings A (Cichlid, Zevenhuizen, The Netherlands).
20. Witte F, van Oijen MJP (1990) Taxonomy, ecology and fishery of Lake Victoria haplochromine trophic groups. *Zool Verh* 262:1–47.
21. Goldschmidt T, Goudswaard K (1989) Reproductive strategies in haplochromines (Pisces, Cichlidae) from Lake Victoria. *An Ecological and Morphological Field Study on the Haplochromine Cichlid Fishes (Pisces, Cichlidae) of Lake Victoria*. PhD thesis, ed Goldschmidt T. (Rijksuniversiteit Leiden, Leiden, The Netherlands), pp 93–119.
22. Goldschmidt T, Witte F (1990) Reproductive strategies of zooplanktivorous haplochromine cichlids (Pisces) from Lake Victoria before the Nile perch boom. *Oikos* 58:356–368.
23. Witte F, et al. (1992) The destruction of an endemic species flock: Quantitative data on the decline of the haplochromine cichlids of Lake Victoria. *Environ Biol Fish* 34:1–28.
24. Witte-Maas ELM, Witte F (1985) *Haplochromis nyererei, a New Cichlid Fish from Lake Victoria Named in Honour of Mwalimu Julius Nyerere, President of Tanzania*. (Brill, Leiden, The Netherlands), pp 1–13.
25. Fishbase. [www.fishbase.org](http://www.fishbase.org)
26. Milton DA, et al. (1990) Reproductive biology of *Spratelloides delicatulus*, *S. gracilis* and *Stolephorus heterolobus* from Solomon Islands and Maldives. *Tuna Baitfish in the Indo-Pacific Region: Proceedings of a Workshop*, eds Blaber SJM, Copland JW (ACIAR Proceedings, Australian Centre for International Agricultural Research, Canberra, Honiara, Solomon Islands), Vol 30, pp 89–98.
27. Luther G (1990) Biology of whitebait anchovies in Indians waters. *Tuna Baitfish in the Indo-Pacific Region: Proceedings of a Workshop*, eds Blaber SJM, Copland JW (ACIAR Proceedings, Australian Centre for International Agricultural Research, Canberra, Honiara, Solomon Islands), Vol 30, pp 75–82.
28. Dalzell, P (1990) Biology and population dynamics of tuna baitfish in Papua New Guinea. *Tuna Baitfish in the Indo-Pacific Region: Proceedings of a Workshop*, eds Blaber SJM, Copland JW (ACIAR Proceedings, Australian Centre for International Agricultural Research, Canberra, Honiara, Solomon Islands), Vol 30, pp 100–113.
29. Conand F (1988) Biologie et écologie des poissons pélagiques du lagon de Nouvelle-Calédonie utilisables comme appât thonier. *ORSTOM, Collection Études et Thèses* (ORSTOM, Paris), pp 239.
30. Hallier JP (1990) Biology of tuna baitfish of Seychelles. *Tuna Baitfish in the Indo-Pacific Region: Proceedings of a Workshop*, eds Blaber SJM, Copland JW (ACIAR Proceedings, Australian Centre for International Agricultural Research, Canberra, Honiara, Solomon Islands), Vol 30, pp 60–69.
31. Milton DA, Blaber SJ, Rawlinson NJ (1994) Reproductive biology and egg production of three species of Clupeidae from Kiribati, Tropical Central Pacific. *Fish Bull* 92:102–121.
32. Jayabalan N, Thangaraja M (1987) Laboratory reared eggs and prolarval stages of silverbelly *Leiognathus* sp. *Environ Ecol* 5:419–421.
33. Coulter GW (1991) Pelagic fish. *Lake Tanganyika and Its Life*, ed Coulter GW (British Museum of Natural History/Oxford Univ Press, London), pp 111–138.
34. Kinoshita I (1997) Early life histories of pelagic fishes. *Fish Communities in Lake Tanganyika*, eds Kawanabe H, Hori M, Nagoshi M (Kyoto Univ Press, Kyoto), pp 259–273.
35. Wanink JH, Goudswaard PC (1994) Effects of Nile Perch (*Lates niloticus*) introduction into Lake Victoria, East Africa, on the diet of pied Kindfishers (*Ceryle rudis*). *Hydrobiologia* 279/280:367–376.
36. Wanink JH (1998) *The Pelagic Cyprinid Rastrineobola argentea as a Crucial Link in the Disrupted Ecosystem of Lake Victoria: Dwarfs and Giants*. PhD thesis (Leiden University, Leiden, The Netherlands).
37. Marshall B (1993) Biology of the African clupeid *Limnothrissa miodon* with reference to its small size in artificial lakes. *Rev Fish Biol Fish* 3:17–38.
38. Thompson AB (1996) Early life history of *Engraulicypris sardella* (Cyprinidae) in Lake Malawi. *J Plankton Res* 18:1349–1368.

Table S1. Some reproductive characteristics of Lake Malawi mouthbrooding haplochromine cichlids

| Species                                 | Habitat | N   | Mean body mass, g | Mean batch fecundity | Relative fecundity (kg <sup>-1</sup> ) | n   | Oocyte diameter, mm | Ref  |
|-----------------------------------------|---------|-----|-------------------|----------------------|----------------------------------------|-----|---------------------|------|
| <i>Copadichromis quadrimaculatus</i>    | Pelagic | 19  | 60.3              | 40                   | 663                                    | 8   | 5.2                 | 6    |
| <i>Diplotaxodon apogon</i>              | Pelagic | 64  | 25.2              | 16                   | 635                                    | 22  | 5.4                 | 6    |
| <i>D. argenteus</i>                     | Pelagic | 10  | 112.5             | 40                   | 356                                    | 3   | 6.9                 | 6    |
| <i>D. "big eye"</i>                     | Pelagic | 17  | 69.0              | 42                   | 452                                    | 17  | 5.1                 | 10,4 |
| <i>D. limnothrissa</i>                  | Pelagic | 144 | 37.6              | 17                   | 495                                    | 21  | 6.3                 | 6    |
| <i>D. macrops</i>                       | Pelagic | 212 | 36.4              | 18                   | 493                                    | 46  | 6.0                 | 6    |
| <i>Pallidochromis tokolosh</i>          | Pelagic | 28  | 81.2              | 40                   | 602                                    | 3   | 6.8                 | 6    |
| <i>Rhamphochromis longiceps*</i>        | Pelagic | 70  | 173.0             | 50                   | 288                                    | 70  | 6.6                 | 10,4 |
| <i>R. woodi*</i>                        | Pelagic | 28  | 522.0             | 241                  | 461                                    | 18  | 6.7                 | 10,4 |
| <i>R. macrophthalmus</i>                | Pelagic | 1   | 934.0             | 522                  | 559                                    |     | 5.0                 | 10,B |
| <i>R. "grey"</i>                        | Pelagic | 5   | 323.0             | 134                  | 416                                    |     | 5.0                 | 11,B |
| <i>R. esox</i>                          | Pelagic | 8   | 573.0             | 348                  | 608                                    |     | 5.0                 | 11,B |
| <b>Means</b>                            |         |     |                   |                      | <b>502 ± 33</b>                        |     | <b>5.8 ± 0.23</b>   |      |
| <i>Alticorpus "geoffreyi"</i>           | Benthic | 60  | 67.0              | 146                  | 2179                                   | 26  | 3.9                 | 6    |
| <i>A. macrocleithrum</i>                | Benthic | 66  | 41.5              | 152                  | 3663                                   | 24  | 3.6                 | 6    |
| <i>A. mentale</i>                       | Benthic | 99  | 177.2             | 229                  | 1292                                   | 31  | 4.2                 | 6    |
| <i>A. pectinatum</i>                    | Benthic | 22  | 33.1              | 112                  | 3384                                   | 3   | 3.7                 | 6    |
| <i>Aulonocara "blue orange"</i>         | Benthic | 27  | 5                 | 28                   | 5600                                   | 16  | 3.1                 | 6    |
| <i>Au. "minutus"</i>                    | Benthic | 33  | 2.2               | 16                   | 7273                                   | 29  | 3.1                 | 6    |
| <i>Au. "cf. macrochir"</i>              | Benthic | 4   | 36.8              | 80                   | 2174                                   | 8   | 3.2                 | 6    |
| <i>Au. "rostratum deep"</i>             | Benthic | 8   | 33.5              | 81                   | 2418                                   | -   |                     | 6    |
| <i>Buccochromis lepturus</i>            | Benthic | 7   | 452.1             | 436                  | 964                                    | 4   | 4.0                 | 6    |
| <i>B. nototaenia</i>                    | Benthic | 7   | 89.5              | 179                  | 2000                                   | 3   | 3.5                 | 6    |
| <i>Copadichromis virginalis</i>         | Benthic | 353 | 21.7              | 28                   | 1290                                   | 76  | 3.9                 | 6    |
| <i>Lethrinops argenteus</i>             | Benthic | 196 | 56.1              | 119                  | 2121                                   | 28  | 4.0                 | 6    |
| <i>L. "deep water albus"</i>            | Benthic | 15  | 29.6              | 107                  | 3615                                   | 3   | 3.5                 | 6    |
| <i>L. "dw altus"</i>                    | Benthic | 71  | 9.6               | 37                   | 3854                                   | 34  | 3.3                 | 6    |
| <i>L. gossei</i>                        | Benthic | 421 | 52.6              | 108                  | 2053                                   | 190 | 4.1                 | 6    |
| <i>L. longimanus</i>                    | Benthic | 6   | 40.3              | 73                   | 1811                                   | 4   | 3.7                 | 6    |
| <i>L. macrochir</i>                     | Benthic | 4   | 34.7              | 107                  | 3084                                   | 2   | 3.5                 | 6    |
| <i>L. "minutus"</i>                     | Benthic | 11  | 3.8               | 19                   | 5000                                   | -   |                     | 6    |
| <i>L. "oliveri"</i>                     | Benthic | 98  | 9.3               | 46                   | 4946                                   | 45  | 3.3                 | 6    |
| <i>L. polli</i>                         | Benthic | 37  | 13.2              | 37                   | 2803                                   | 18  | 3.6                 | 6    |
| <i>Mylochromis anaphyrmus</i>           | Benthic | 89  | 62.7              | 150                  | 2392                                   | 21  | 3.5                 | 6    |
| <i>Nyassachromis "argyrosoma"</i>       | Benthic | 83  | 4.0               | 33                   | 4925                                   | 16  | 3.3                 | 6    |
| <i>Otopharynx "productus"</i>           | Benthic | 5   | 14.8              | 34                   | 2297                                   | -   |                     | 6    |
| <i>O. speciosus</i>                     | Benthic | 4   | 179.5             | 162                  | 903                                    | -   |                     | 6    |
| <i>Placidochromis "long"</i>            | Benthic | 11  | 5.7               | 26                   | 4561                                   | 10  | 3.1                 | 6    |
| <i>Pl. "platyrhynchus"</i>              | Benthic | 65  | 20.5              | 53.5                 | 2610                                   | 24  | 3.6                 | 6    |
| <i>Pseudotropheus livingstonii</i>      | Benthic | 9   | 3.9               | 26                   | 6667                                   | 7   | 3.2                 | 6    |
| <i>Sciaenochromis alhi</i>              | Benthic | 11  | 23.5              | 48                   | 2043                                   | 3   | 3.9                 | 6    |
| <i>Sc. benthicola</i>                   | Benthic | 19  | 43.7              | 56                   | 1281                                   | 13  | 4.4                 | 6    |
| <i>Stigmatochromis "guttatus"</i>       | Benthic | 9   | 33.3              | 41                   | 1231                                   | 4   | 4.5                 | 6    |
| <i>Taeniolethrinops furcicauda</i>      | Benthic | 6   | 100.1             | 180                  | 1798                                   | 3   | 3.4                 | 6    |
| <i>T. praeorbitalis</i>                 | Benthic | 5   | 156.8             | 226                  | 1441                                   | 3   | 4.3                 | 6    |
| <i>Trematocranus breviostris</i>        | Benthic | 37  | 7.1               | 32                   | 4507                                   | 12  | 3.3                 | 6    |
| <i>Tr. placodon</i>                     | Benthic | 10  | 67.0              | 135                  | 2015                                   | 5   | 3.6                 | 6    |
| <b>Means</b>                            |         |     |                   |                      | <b>2947 ± 282</b>                      |     | <b>3.6 ± 0.07</b>   |      |
| <i>Cynotilapia afra</i>                 | Rocky   | 117 | 7.4               | 21                   | 2838                                   | 49  | 3.8                 | A    |
| <i>Genyochromis mento</i>               | Rocky   | 10  | 13.1              | 30                   | 2290                                   | 9   | 3.7                 | A    |
| <i>Labeotropheus fuelleborni</i>        | Rocky   | 37  | 16.5              | 27                   | 1636                                   | 9   | 4.4                 | A    |
| <i>L. trewavasae</i>                    | Rocky   | 6   | 15.0              | 27                   | 1800                                   | 3   | 4.0                 | A    |
| <i>Melanochromis auratus</i>            | Rocky   | 7   | 8.4               | 24                   | 2857                                   | 2   | 3.5                 | A    |
| <i>M. vermivorus</i>                    | Rocky   | 22  | 7.3               | 19                   | 2603                                   | 7   | 3.8                 | A    |
| <i>Petrotilapia "fuscous"</i>           | Rocky   | 12  | 24.5              | 46                   | 1878                                   | 3   | 4.1                 | A    |
| <i>P. nigra</i>                         | Rocky   | 4   | 31.5              | 45                   | 1429                                   | 2   | 4.3                 | A    |
| <i>Pseudotropheus "aggressive blue"</i> | Rocky   | 10  | 13.1              | 29                   | 2214                                   | 4   | 4.1                 | A    |
| <i>Ps. "ag. grey head"</i>              | Rocky   | 7   | 8.0               | 23                   | 2875                                   | 6   | 3.7                 | A    |
| <i>Ps. aurora</i>                       | Rocky   | 37  | 10.8              | 30                   | 2778                                   | 18  | 3.7                 | A    |
| <i>Ps. barlowi</i>                      | Rocky   | 22  | 11.0              | 34                   | 3091                                   | 10  | 3.6                 | A    |
| <i>Ps. callainos</i>                    | Rocky   | 31  | 10.0              | 17                   | 1700                                   | 17  | 4.4                 | A    |
| <i>Ps. heteropictus</i>                 | Rocky   | 7   | 9.7               | 29                   | 2990                                   | 4   | 3.6                 | A    |
| <i>Ps. tropheops "blue"</i>             | Rocky   | 6   | 13.6              | 32                   | 2353                                   | 4   | 3.7                 | A    |
| <i>Ps. tr. "lilac"</i>                  | Rocky   | 9   | 14.9              | 31                   | 2081                                   | 5   | 3.8                 | A    |
| <i>Ps. tr. "orange chest"</i>           | Rocky   | 45  | 14.0              | 31                   | 2214                                   | 16  | 3.9                 | A    |
| <i>Ps. tr. "red cheek"</i>              | Rocky   | 14  | 13.2              | 22                   | 1667                                   | 10  | 3.9                 | A    |
| <i>Ps. williamsi</i>                    | Rocky   | 17  | 15.3              | 40                   | 2614                                   | 10  | 3.9                 | A    |
| <i>Ps. zebra "black dorsal"</i>         | Rocky   | 18  | 13.5              | 33                   | 2444                                   | 6   | 3.9                 | A    |
| <i>Ps. zebra "red dorsal"</i>           | Rocky   | 388 | 9.3               | 27                   | 2903                                   | 143 | 3.6                 | A    |
| <i>Ps. zebra "yellow throat"</i>        | Rocky   | 18  | 12.9              | 29                   | 2248                                   | 6   | 3.9                 | A    |
| <i>Ps. zebra</i>                        | Rocky   | 148 | 10.7              | 27                   | 2523                                   | 54  | 3.9                 | A    |
| <b>Means</b>                            |         |     |                   |                      | <b>2349 ± 102</b>                      |     | <b>3.9 ± 0.05</b>   |      |

N and n, number of fishes used for fecundity and oocyte size calculation, respectively. References: (A) F.D. et al. (unpublished data); (B) R. L. Robinson (unpublished data). \*, value corresponds to the arithmetic mean of the longest and smallest lengths of the oocytes. Means ± SEM per fish category are shown in bold type.

Table S2. Some reproductive characteristics of Lake Tanganyika mouthbrooding cichlids

| Species                             | Habitat | Body mass, g | Batch fecundity | Relative fecundity (kg <sup>-1</sup> ) | Oocyte diameter, mm | Ref        |
|-------------------------------------|---------|--------------|-----------------|----------------------------------------|---------------------|------------|
| <i>Bathybates ferox</i>             | Pelagic | 785.9        | 63              | 80                                     | 7                   | 12, 18, 19 |
| <i>Bathybates horni</i>             | Pelagic | 360.1        | 63              | 175                                    | 6.5                 | 12, 18, 19 |
| <i>Bathybates minor</i>             | Pelagic | 166.4        | 60              | 361                                    | 6                   | 12, 18, 19 |
| <i>Hemibates stenosoma</i>          | Pelagic | 610.4        | 31              | 51                                     | 7                   | 12, 18, 19 |
| <b>Means</b>                        |         |              |                 | <b>167 ± 70</b>                        | <b>6.6 ± 0.24</b>   |            |
| <i>Callochromis macrops</i>         | Benthic | 22.5         | 51              | 2269                                   | 4.2                 | 15         |
| <i>Gnathochromis permaxillaris</i>  | Benthic | 104.6        | 150             | 1434                                   | 2                   | 12, 18, 19 |
| <i>Gnathochromis pfefferi</i>       | Benthic | 11.5         | 52              | 4537                                   | 3.1                 | 15         |
| <i>Greenwoodochromis bellcrossi</i> | Benthic | 220.9        | 200             | 906                                    | 2.5                 | 12         |
| <i>Limnochromis staneri</i>         | Benthic | 210.3        | 200             | 951                                    | 2                   | 12         |
| <i>Plecodus multidentatus</i>       | Benthic | 246.9        | 44              | 178                                    | 2.5                 | 12         |
| <i>Reganochromis calliurus</i>      | Benthic | 100.3        | 104             | 1036                                   | 2.2                 | 12         |
| <i>Reganochromis centropomoides</i> | Benthic | 102.5        | 200             | 1952                                   | 2.8                 | 12         |
| <i>Tangachromis dhanisi</i>         | Benthic | 17.0         | 50              | 2948                                   | 2                   | 12, 18, 19 |
| <i>Trematocara kufferathi</i>       | Benthic | 8.4          | 37              | 4386                                   | 1.5                 | 12, 18, 19 |
| <i>Trematocara nigrifrons</i>       | Benthic | 43.7         | 71              | 1625                                   | 3                   | 12         |
| <i>Trematocara unimaculatum</i>     | Benthic | 100.3        | 60              | 598                                    | 2                   | 12         |
| <i>Triglachromis otostigma</i>      | Benthic | 29.1         | 100             | 3437                                   | 1                   | 12         |
| <i>Xenochromis hecqui</i>           | Benthic | 748.2        | 300             | 401                                    | 2.5                 | 12         |
| <i>Xenotilapia longispinis</i>      | Benthic | 130.2        | 52              | 400                                    | 3.5                 | 12         |
| <i>Xenotilapia nigrolabiata</i>     | Benthic | 64.1         | 20              | 312                                    | 4                   | 12         |
| <i>Xenotilapia ornatipinnis</i>     | Benthic | 56.7         | 45              | 794                                    | 2                   | 12         |
| <i>Xenotilapia sima</i>             | Benthic | 33.8         | 62              | 1832                                   | 3.6                 | 15         |
| <i>Xenotilapia ochrogenys</i>       | Benthic | 8.4          | 35              | 4149                                   | 3.1                 | 15         |
| <b>Means</b>                        |         |              |                 | <b>1797 ± 331</b>                      | <b>2.6 ± 0.19</b>   |            |
| <i>Aulonocranus dewindti</i>        | Rocky   | 11.9         | 25              | 2092                                   | 4.3                 | 15         |
| <i>Cyathopharynx furcifer</i>       | Rocky   | 44.9         | 48              | 1069                                   | 4.7                 | 15         |
| <i>Cyphotilapia frontosa</i>        | Rocky   | 1096.9       | 25              | 23                                     | 6.7                 | 13, 14     |
| <i>Cyprichromis leptosoma</i>       | Rocky   | 10.1         | 11              | 1090                                   | 4.4                 | 15, 18, 19 |
| <i>Eretmodus cyanostictus</i>       | Rocky   | 4.3          | 17              | 3970                                   | 3.6                 | 15         |
| <i>Ophthalmotilapia nasutus</i>     | Rocky   | 21.7         | 19              | 875                                    | 5                   | 15         |
| <i>Ophthalmotilapia ventralis</i>   | Rocky   | 9.7          | 13              | 1346                                   | 4.8                 | 15         |
| <i>Perissodus microlepis</i>        | Rocky   | 41.6         | 171             | 4114                                   | 1.7                 | 12         |
| <i>Petrochromis famula</i>          | Rocky   | 24.3         | 17              | 698                                    | 6.4                 | 15         |
| <i>Petrochromis orthognathus</i>    | Rocky   | 31.8         | 29              | 913                                    | 6                   | 15         |
| <i>Petrochromis polyodon</i>        | Rocky   | 71.1         | 22              | 309                                    | 7.1                 | 15         |
| <i>Pseudosimochromis curvifrons</i> | Rocky   | 10.5         | 8               | 760                                    | 4.5                 | 15         |
| <i>Simochromis diagramma</i>        | Rocky   | 13.6         | 20              | 1471                                   | 5.2                 | 15         |
| <i>Simochromis marginatus</i>       | Rocky   | 15.2         | 19              | 1249                                   | 4.5                 | 15         |
| <i>Spathodus marlieri</i>           | Rocky   | 3.6          | 15              | 4179                                   | 3.5                 | 14, 17     |
| <i>Tropheus duboisi</i>             | Rocky   | 18.8         | 8               | 426                                    | 6.1                 | 16         |
| <i>Tropheus moorii</i>              | Rocky   | 16.9         | 12              | 709                                    | 6.3                 | 16         |
| <b>Means</b>                        |         |              |                 | <b>1488 ± 322</b>                      | <b>5.0 ± 0.33</b>   |            |

Means ± SEM per fish category appear in bold type.



Table S3. Some reproductive characteristics of Lake Victoria mouthbrooding haplochromine cichlids

| Species                            | Habitat | Body mass, g | Batch fecundity | Relative fecundity (kg <sup>-1</sup> ) | Oocyte diameter, mm | Ref        |
|------------------------------------|---------|--------------|-----------------|----------------------------------------|---------------------|------------|
| <i>Haplochromis "kribensis"</i>    | Pelagic | 7.5          | 22              | 2917                                   | 3.5                 | 20, 21, 23 |
| <i>H. "argens"</i>                 | Pelagic | 5.3          | 23              | 4340                                   | 3.4                 | 22, 23     |
| <i>H. laparogramma</i>             | Pelagic | 8.5          | 20              | 2349                                   | 3.6                 | 22, 23     |
| <i>H. heusinkveldi</i>             | Pelagic | 7.5          | 26              | 3448                                   | 3.7                 | 22, 23     |
| <i>H. pyrrhocephalus</i>           | Pelagic | 3.9          | 27              | 6864                                   | 3.1                 | 22, 23     |
| <i>H. piceatus</i>                 | Pelagic | 5.1          | 33              | 6530                                   | 3                   | 22, 23     |
| <b>Means</b>                       |         |              |                 | <b>4408 ± 473</b>                      | <b>3.4 ± 0.11</b>   |            |
| <i>H. "nigrofasciatus"</i>         | Benthic | 2.8          | 20              | 7054                                   | 3                   | 21         |
| <i>H. "reginus"</i>                | Benthic | 3.6          | 28              | 7687                                   | 3.1                 | 21, 22, 23 |
| <i>H. nanoserranus</i>             | Benthic | 28.2         | 66              | 2340                                   | 3.4                 | 20         |
| <i>H. "dusky wine-red fin"</i>     | Benthic | 3.2          | 32              | 9932                                   | 3.1                 | 21         |
| <i>H. crocopeplus</i>              | Benthic | 28.2         | 82              | 2907                                   | 3.4                 | 20         |
| <i>H. "red tail incurved head"</i> | Benthic | 11.9         | 63              | 5273                                   | 3.2                 | 21         |
| <i>H. teegeaari</i>                | Benthic | 17.6         | 87              | 4945                                   | 3.2                 | 21         |
| <i>H. "cinctus-like"</i>           | Benthic | 6.0          | 63              | 10494                                  | 2.8                 | 21         |
| <i>H. "red tridens"</i>            | Benthic | 7.3          | 68              | 9284                                   | 2.4                 | 21         |
| <i>H. "profundus"</i>              | Benthic | 17.6         | 94              | 5343                                   | 3.2                 | 21         |
| <b>Means</b>                       |         |              |                 | <b>6526 ± 899</b>                      | <b>3.1 ± 0.09</b>   |            |
| <i>Pundamilia nyererei</i>         | Rocky   | 5.9          | 33              | 5580                                   | 3.6                 | 24         |
| <i>Neochromis rufocaudalis</i>     | Rocky   | 22.9         | 25              | 1093                                   | 3.5                 | 20, 21     |
| <i>Neochromis greenwoodi</i>       | Rocky   | 14.1         | 27              | 1912                                   | 3.2                 | 21         |
| <b>Means</b>                       |         |              |                 | <b>2862 ± 1379</b>                     | <b>3.4 ± 0.12</b>   |            |

Means ± SEM per fish category appear in bold type.

**Table S4. Some reproductive characteristics of the noncichlid pelagic fish species of the East African Great Lakes and of the most common marine pelagic teleost species**

| Species                                               | Relative fecundity<br>(kg <sup>-1</sup> ) | Oocyte<br>diameter, mm | Ref    |
|-------------------------------------------------------|-------------------------------------------|------------------------|--------|
| <b>Marine pelagic species</b>                         | <b>419,183 ± 74215</b>                    | <b>0.99 ± 0.05</b>     |        |
| <b>Scombridae</b>                                     | <b>295,951 ± 112,394</b>                  | <b>0.98 ± 0.03</b>     |        |
| <i>Thunnus albacares</i>                              | 12,700                                    | 0.96                   | 25     |
| <i>Thunnus alalunga</i>                               | 161,300                                   |                        | 25     |
| <i>Thunnus obesus</i>                                 | 188,311                                   | 1.05                   | 25     |
| <i>Thunnus maccoyii</i>                               | 571,428                                   | 0.71                   | 25     |
| <i>Thunnus thynnus</i>                                | 123,762                                   | 1.0                    | 25     |
| <i>Acanthocybium solandri</i>                         | 560,747                                   |                        | 25     |
| <i>Euthynnus affinis</i>                              | 95,455                                    |                        | 25     |
| <i>Euthynnus alletteratus</i>                         | 17,750                                    |                        | 25     |
| <i>Scomber scombrus</i>                               | 1,709,401                                 | 1.15                   | 25     |
| <i>Scomberomorus cavalla</i>                          | 28,110                                    |                        | 25     |
| <i>Scomberomorus commerson</i>                        | 99,043                                    |                        | 25     |
| <i>Scomberomorus maculatus</i>                        | 192,678                                   | 1.0                    | 25     |
| <i>Auxis thazard thazard</i>                          | 501,253                                   |                        | 25     |
| <i>Auxis rochei rochei</i>                            | 124,000                                   | 0.97                   | 25     |
| <i>Katsuwonus pelamis</i>                             | 53,333                                    | 1.0                    | 25     |
| <b>Engraulidae</b>                                    | <b>512,880 ± 112,679</b>                  | <b>1.08 ± 0.10</b>     |        |
| <i>Engraulis mordax</i>                               | 191,667                                   | 1.01                   | 25     |
| <i>Engraulis encrassicolus</i>                        | 100,000                                   | 1.5                    | 25     |
| <i>Anchoa hepsetus</i>                                | 356,250                                   | 1.08                   | 25     |
| <i>Encrassicholina heterolobus</i>                    | 775,000                                   | 0.74                   | 26     |
| <i>Encrassicholina devisi</i>                         | 1,039,000                                 |                        | 27     |
| <i>Encrassicholina punctifer</i>                      | 875,000                                   |                        | 28     |
| <i>Encrassicholina indicus</i>                        | 694,000                                   |                        | 25, 27 |
| <i>Thrissina baelama</i>                              | 361,000                                   |                        | 29     |
| <i>Stolephorus waitei</i>                             | 224,000                                   |                        | 28     |
| <b>Clupeidae</b>                                      | <b>306,311 ± 65,433</b>                   | <b>1.16 ± 0.13</b>     |        |
| <i>Clupea harengus</i>                                | 327,869                                   | 1.16                   | 25     |
| <i>Clupea pallasii</i>                                | 86,301                                    | 1.4                    | 25     |
| <i>Sardinops sagax</i>                                | 227,273                                   | 1.1                    | 25     |
| <i>Sardinella pilchardus</i>                          | 576,923                                   | 1.5                    | 25     |
| <i>Herklotsichthys quadrimaculatus</i>                | 319,500                                   | 0.65                   | 30,31  |
| <i>Amblygaster sirm</i>                               | 300,000                                   |                        | 29     |
| <b>Dussumieriidae</b>                                 | <b>1,228,000 ± 461,000</b>                | <b>0.59 ± 0.005</b>    |        |
| <i>Spratelloides delicatulus</i>                      | 767,000                                   | 0.59                   | 26,31  |
| <i>Spratelloides gracilis</i>                         | 1,689,000                                 | 0.58                   | 26,28  |
| <b>Leiognathidae</b>                                  |                                           |                        |        |
| <i>Leiognathus bindus</i>                             | 484,000                                   | 0.6                    | 29, 32 |
| <b>African Great Lakes noncichlid pelagic species</b> |                                           |                        |        |
| <i>Engraulicypris sardella</i>                        |                                           | 0.5                    | 38     |
| <i>Stolothrissa tanganicae</i>                        |                                           | <1.0                   | 34     |
| <i>Limnothrissa miodon</i>                            | 1,532,000                                 | <1.0                   | 37     |
| <i>Lates stappersi</i>                                | 550,000                                   | 0.5                    | 33     |
| <i>Rastrineobola argentea</i>                         | 583,000                                   | 0.5                    | 35, 36 |

Means ± SEM per fish category in bold.
